# Supplementary material
Source: PubMed Central journal article supplement (PMC4550506)
Supplement: NIHMS707985-supplement-Legacy_Supplemental_File.pdf [file NIHMS707985-supplement-Legacy_Supplemental_File.pdf]

**Acknowledgment Permission Form**Journal | STROKEManuscript No. 2015/009870R1First author | Tao YanTitle of work | Neurorestorative Therapy of stroke in Type 2 Diabetes Rats treated with Human Umbilical Cord Blood cells.

Acknowledgment Permission:

Authors must provide written permission/approval from all individuals mentioned by name in the Acknowledgements section of a submitted manuscript. By signing this form, any and all acknowledged persons therefore state that they have read and approved the mention of their names in the Acknowledgment section of the aforementioned paper.

Printed Name | Ginge LuSignature | Date | 7/8/15Printed Name | Sutapa SantraSignature | Date | 7/8/2015

Printed Name | \_\_\_\_\_

Signature | \_\_\_\_\_

Date | \_\_\_\_\_

Printed Name | \_\_\_\_\_

Signature | \_\_\_\_\_

Date | \_\_\_\_\_
